# Supplementary material
Source: bioRxiv or medRxiv preprint supplement (https://medrxiv.org/highwire/filestream/84332/field_highwire_adjunct_files/0/2020.06.02.20120303-1.pdf)
Supplement: Supplementary file [file 2020.06.02.20120303-1.pdf]

# An MRI-based, data-driven model of cortical laminar connectivity

Ittai Shamir <sup>1</sup> and Yaniv Assaf <sup>1,2</sup>

<sup>1</sup> Department of Neurobiology, Faculty of Life Sciences, Tel Aviv University, Tel Aviv, Israel

<sup>2</sup> Sagol School of Neuroscience, Tel Aviv University, Tel Aviv, Israel

\* Correspondence:

Ittai Shamir

[ittaisha@mail.tau.ac.il](mailto:ittaisha@mail.tau.ac.il)

ORCID: 0000-0003-4028-5154

## Electronic Supplementary Material

### 1. Summary of reviewed articles

Following is a summary table of all 51 articles included in our systematic review (table 1):

|    | First Author/s         | Year | Journal                     | Human/ Animal                                                    | Method                                                                                                | Model Y/N | Region/s                                                  |
|----|------------------------|------|-----------------------------|------------------------------------------------------------------|-------------------------------------------------------------------------------------------------------|-----------|-----------------------------------------------------------|
| 1  | Hubel & Wiesel         | 1962 | Journal of Physiology       | Cat                                                              | Recordings                                                                                            | N         | Visual cortex                                             |
| 2  | Herkenham              | 1980 | Science                     | Rat                                                              | Microphotographs (also mention histology, electrophysiology, tracing)                                 | N         | primary somatosensory                                     |
| 3  | Douglas et al.         | 1989 | Neural Computation          | Cat (generalized)                                                | Intracellular recordings, histological staining (horseradish)                                         | Y         | whole-cortex (canonical), based on visual cortex          |
| 4  | Felleman & Van Essen   | 1991 | Cerebral Cortex             | Primate (macaque)                                                | Histology                                                                                             | Y         | multiple cortical regions (occipital, temporal, parietal) |
| 5  | Douglas & Martin       | 1991 | Journal of Physiology       | Cat                                                              | Recording of electrical stimulation                                                                   | Y         | Visual cortex                                             |
| 6  | Mumford                | 1991 | Biological Cybernetics      | Cat                                                              | Electrical recording                                                                                  | N         | V1 and primary motor                                      |
| 7  | Mountcastle            | 1997 | Brain                       | Primate (monkey, macaque) mainly, also cat                       | Electrical recording                                                                                  | Y         | general                                                   |
| 8  | Nelson                 | 2002 | Neuron                      | Cat, rodent (mouse), primate, human                              | Recording, photomicrograph, histology, photostimulation                                               | N         | canonical circuit, visual cortex                          |
| 9  | Buxhoeveden & Casanova | 2002 | Brain                       | Cat, rodent (mouse, rat, rabbit), primate (rhesus monkey), human | Histology (Nissl, Golgi staining), metabolic labelling, electrical recording                          | Y         | intrinsic pathways                                        |
| 10 | DeFelipe et al.        | 2002 | Journal of Neurocytology    | Multiple                                                         | Multiple                                                                                              | N         | multiple                                                  |
| 11 | Raizada & Grossberg    | 2003 | Cerebral Cortex             | Macaque mainly, also cat                                         | Multiple methods (review of functional recorded connection into a single model- LAMINART +simulation) | Y         | Visual cortex                                             |
| 12 | Binzegger et al.       | 2004 | The Journal of Neuroscience | Cat                                                              | In-vivo staining, in vivo recordings                                                                  | Y         | Visual Cortex                                             |

Electronic Supplementary Material

|    |                     |      |                                                 |                                                             |                                                                                                                                                                     |   |                                                                    |
|----|---------------------|------|-------------------------------------------------|-------------------------------------------------------------|---------------------------------------------------------------------------------------------------------------------------------------------------------------------|---|--------------------------------------------------------------------|
| 13 | Douglas & Martin    | 2004 | Annual Review of Neuroscience                   | Human, cat, rat, monkey (multiple-review)                   | Multiple (review)- staining (Golgi), electrophysiology, degeneration, retrograde traces (horseradish, peroxidase, fast blue), ESEM                                  | Y | Visual Cortex, generalized to entire cortex                        |
| 14 | Shipp               | 2005 | Philosophical transactions of the royal society | Animal, some human (multiple-review)                        | Multiple- imaging, histology, recording. Etc.                                                                                                                       | Y | General (agranular, granular and dysgranular regions connectivity) |
| 15 | Hirsch & Martinez   | 2006 | Current Opinion in Neurobiology                 | Cat, also monkey                                            | Recordings of stimuli                                                                                                                                               | Y | Visual cortex                                                      |
| 16 | Douglas & Martin    | 2007 | Neuron                                          | Cat, primate                                                | Staining, electrophysiology, etc.                                                                                                                                   | Y | Canonical circuit, visual Cortex                                   |
| 17 | Lubke & Feldmeyer   | 2007 | Brain Structure and Function                    | Rodent mainly, also human and primate                       | Electrical recording, infrared microscopy, optical probing, photostimulation, ESEM                                                                                  | Y | Simplified model                                                   |
| 18 | Helmstaedter et al. | 2007 | Brain Research Reviews                          | Rat                                                         | Electrical recordings, optical reconstruction                                                                                                                       | Y | Somatosensory, general                                             |
| 19 | Thomson & Lamy      | 2007 | Frontiers in Neuroscience                       | Cat, mice ('green mice')                                    | Cellular recordings (intra/whole-cell), anatomy, imaging, (histology), stereological, analysiss, immunocytochemical, cellular markers, genomics, immunofluorescence | Y | General                                                            |
| 20 | Shipp               | 2007 | Current Biology                                 | Primate                                                     | Electric recording, etc.                                                                                                                                            | Y | Nonprimary visual area                                             |
| 21 | Helmstaedter et al. | 2008 | The Journal of Neuroscience                     | Rat                                                         | Electrical recording, histology                                                                                                                                     | Y | Somatosensory                                                      |
| 22 | Weiler et al.       | 2008 | Nature Neuroscience                             | Mouse                                                       | Electrical recording                                                                                                                                                | Y | Sensory cortex                                                     |
| 23 | Binzegger et al.    | 2009 | Neural Networks                                 | Cat                                                         | Horseradish labelling                                                                                                                                               | Y | Visual cortex                                                      |
| 24 | Da Costa & Martin   | 2010 | Frontiers in Neuroanatomy                       | Multiple (cat mainly, also primates and rodents)            | Multiple                                                                                                                                                            | Y | Intra-regional                                                     |
| 25 | Thomson             | 2010 | Frontiers in Neuroanatomy                       | Mice, rat, primate, cat, human                              | Electrophysiological, dye (histology), retrograde labelling                                                                                                         | Y | Primary sensory                                                    |
| 26 | Meyer et al.        | 2010 | Cerebral Cortex                                 | Rat                                                         | Staining (immunofluorescence), single-cell recording                                                                                                                | Y | Somatosensory                                                      |
| 27 | Meyer et al.        | 2010 | Cerebral Cortex                                 | Rat                                                         | Staining (immunofluorescence), single-cell recording                                                                                                                | N | Somatosensory                                                      |
| 28 | Fishell & Rudy      | 2011 | Annual Review of Neuroscience                   | Human, rodent, cat, primate (multiple)                      | Multiple methods (historical review focused on inhibition)                                                                                                          | N | General                                                            |
| 29 | Shepherd            | 2011 | Frontiers in Neuroanatomy                       | Turtle, human, also cat, primate, opossum (multiple-review) | Electrical recording, histology, genetics, etc. (multiple- review)                                                                                                  | Y | General                                                            |
| 30 | Feldmeyer           | 2012 | Frontiers in Neuroanatomy                       | Rodents (rat and mouse )                                    | Electrophysiological, dye (histology), anterograde and retrograde tracing, cage glutamate release, light activation, etc.                                           | Y | somatosensory (barrel) cortex                                      |

Electronic Supplementary Material

|    |                         |      |                                                                        |                                                                                                         |                                                                                                                                    |   |                                  |
|----|-------------------------|------|------------------------------------------------------------------------|---------------------------------------------------------------------------------------------------------|------------------------------------------------------------------------------------------------------------------------------------|---|----------------------------------|
| 31 | Du et al.               | 2012 | PLoS Computational Biology                                             | Multiple- review as the basis for the model                                                             | Multiple- review +simulation                                                                                                       | Y | Visual cortex, generalized       |
| 32 | Bastos et al.           | 2012 | Neuron                                                                 | Mammal, rodents (mice,rats)                                                                             | Multiple: fMRI, recordings, optogenetics, photostimulation, computational model                                                    | Y | Visual cortex                    |
| 33 | Kennedy & Dehay         | 2012 | Progress in Brain Research                                             | Mainly human, also primate, carnivores, rodents, insectivores, reptiles, amphibians                     | Multiple                                                                                                                           | Y | General                          |
| 34 | Estrada-Sanchez & Rebec | 2013 | Frontiers in Neural Circuits                                           | Multiple                                                                                                | Multiple                                                                                                                           | N | Visual cortex                    |
| 35 | Harris & Mrsic-Flogel   | 2013 | Nature                                                                 | Rodents                                                                                                 | Optical methods, electrical methods, optogenetics                                                                                  | Y | Sensory cortex                   |
| 36 | Beul & Hilgetag         | 2014 | Frontiers in Neuroanatomy                                              | Mainly rodent (also discuss human, cat)                                                                 | Multiple, including histology (anatomical and electrophysiological approaches)                                                     | Y | Cortico-cortical                 |
| 37 | Kiernan & Rajakumar     | 2014 | Lippincott Williams & Wilkins                                          | Human                                                                                                   | Histology (Nissl, Golgi), ESEM, immunohistochemical                                                                                | Y | Intracortical                    |
| 38 | Markov et al.           | 2014 | The Journal of Comparative Neurology, Research in Systems Neuroscience | Macaque                                                                                                 | Retrograde tracing + model                                                                                                         | Y | Visual cortex                    |
| 39 | Dhruv                   | 2015 | Nature Neuroscience                                                    | Mouse, human                                                                                            | Recording, optogenetics                                                                                                            | Y | Canonical                        |
| 40 | Lodato & Arlotta        | 2015 | Annual Review of Developmental Biology                                 | Mouse, rat                                                                                              | Histology (Golgi staining, etc.), electrical recording, tracing, optogenetics                                                      | Y | Barrel cortex                    |
| 41 | Bosman & Aboitiz        | 2015 | Frontiers in Neuroscience                                              | Animals- mammals (cats, rodents, primates) and sauropsids (birds and reptiles) (review of many studies) | Multiple methods- histology, tracing, electrical recording (review of many studies)                                                | Y | Canonical circuit, Visual Cortex |
| 42 | Jiang et al.            | 2015 | Science                                                                | Mice                                                                                                    | Tissue slicing, whole-cell recording, morphological reconstruction                                                                 | Y | General / canonical              |
| 43 | Markram et al.          | 2015 | Cell                                                                   | Rat                                                                                                     | Digital reconstruction from experimental data recordings, followed by simulations                                                  | Y | Somatosensory                    |
| 44 | Ramaswamy et al.        | 2015 | Frontiers in Neural Circuits                                           | Rat                                                                                                     | Digital reconstruction from experimental data recordings, followed by simulations (data includes many methods, database of papers) | Y | Somatosensory                    |
| 45 | Wang & Kennedy          | 2016 | , Current Opinion in Neurobiology                                      | Monkey (macaque), rodent (mouse), (generalized model for mammals)                                       | Multiple: recordings,                                                                                                              | N | General                          |
| 46 | Guy & Staiger           | 2017 | Frontiers in Neuroanatomy                                              | Mouse                                                                                                   | Optogenetics                                                                                                                       | N | Somatosensory                    |
| 47 | Mercer & Thomson        | 2017 | Frontiers in Neuroanatomy                                              | Primate, rat, human, cat (review)                                                                       | Multiple (review)                                                                                                                  | N | General                          |

|    |                      |      |                              |                                                              |                                                                |   |                       |
|----|----------------------|------|------------------------------|--------------------------------------------------------------|----------------------------------------------------------------|---|-----------------------|
| 48 | Hawkins & Ahmad      | 2017 | Frontiers in Neural Circuits | Mouse                                                        | Multiple (electrical recording, etc.)- focus on simulation     | Y | General               |
| 49 | Rockland             | 2017 | NeuroImage                   | Multiple (review)- mainly primates (NHP), also rodents, cats | Multiple methods (review)- anterograde/retrograde tracing, MRI | Y | General               |
| 50 | Roelfsema & Holtmaat | 2018 | Nature Reviews Neuroscience  | Primate, Rodent (human)                                      | Stimulation, simulation (deep learning)                        | Y | Intracortical (local) |
| 51 | Larkum et al.        | 2018 | Frontiers in Neuroanatomy    | Human, rodents                                               | fMRI (high resolution)                                         | Y | General               |

**Table 1** A summary of all 51 records included in the systematic review

## 2. Summary of region-specific reported connections

Following is a summary of reported region-specific cortical laminar connections, organized by origin and termination in the three-layer grouping of infragranular, granular and supragranular layers:

### 2.1 Visual cortex

For a summary of reported cortical laminar connections in the visual cortex see figure 1 (below).

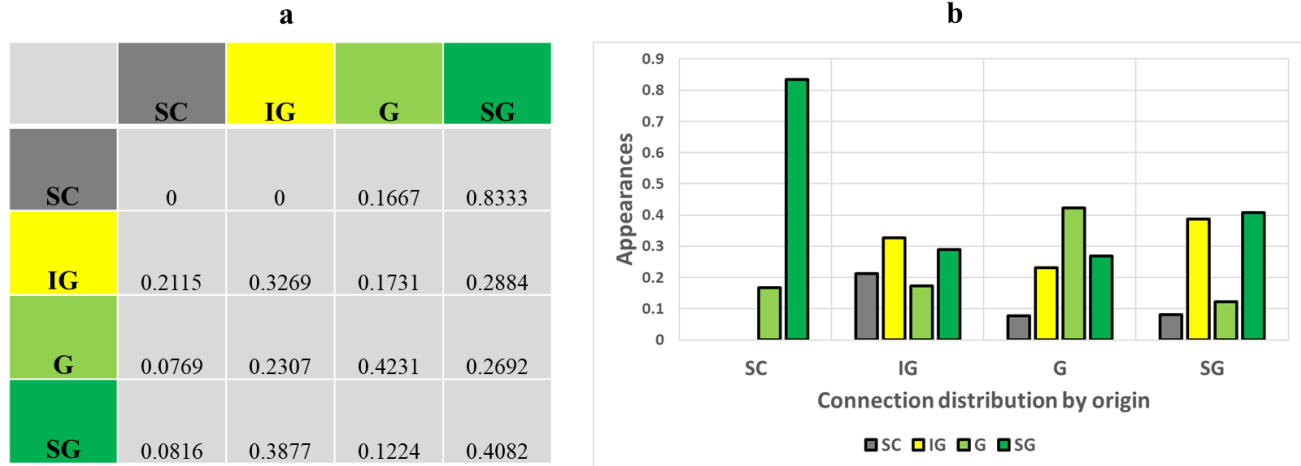

**Fig. 1** Summary of all reported cortical laminar connections in the ‘visual cortex’:

- a- In connectivity matrix format, where: [row, column]=[connection origin, connection termination] and connections are averaged per origin (per row)
- b- Presented as distributions of connection terminations that originate in each of the following: subcortex (left), infragranular (mid left), granular (mid right), supragranular (right)

### 2.2 Sensory cortex

For a summary of reported cortical laminar connections in the sensory cortex see figure 2 (below).

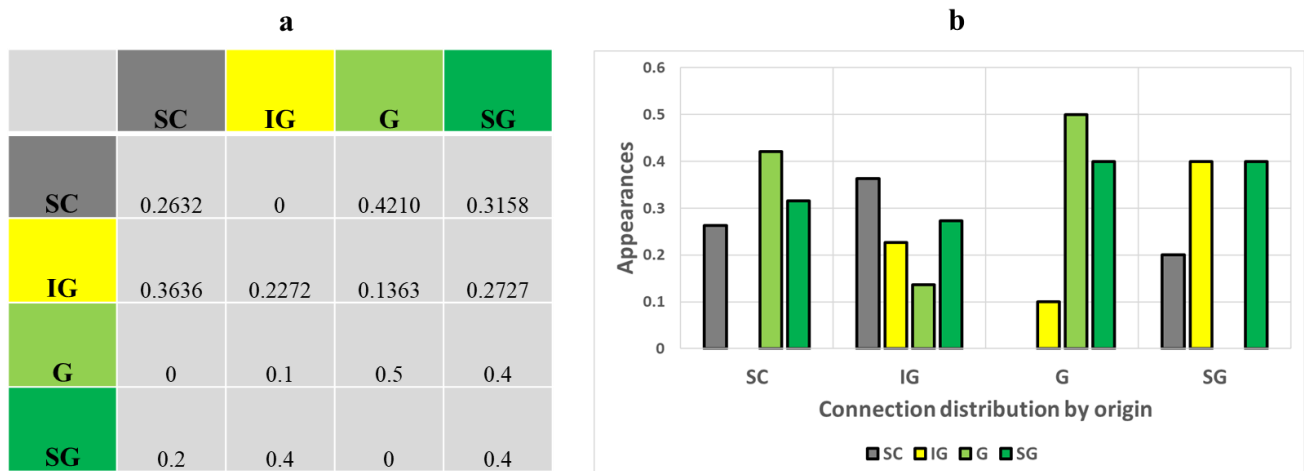

**Fig. 2** Summary of all reported cortical laminar connections in the ‘sensory cortex’:

- a- In connectivity matrix format, where: [row, column]=[connection origin, connection termination] and connections are averaged per origin (per row)

- b- Presented as distributions of connection terminations that originate in each of the following: subcortex (left), infragranular (mid left), granular (mid right), supragranular (right)

### 2.3 General

For a summary of reported cortical laminar connections in the ‘general’ cortical regions see figure 3 (below).

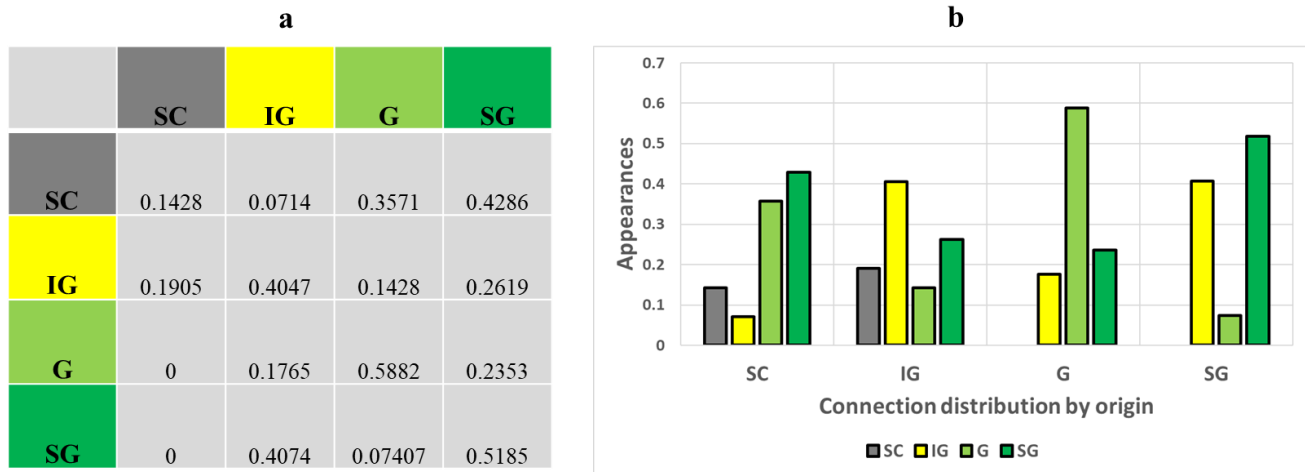

**Fig. 3** Summary of all reported cortical laminar connections in ‘general’ regions:

- a- In connectivity matrix format, where: [row, column]=[connection origin, connection termination] and connections are averaged per origin (per row)
- b- Presented as distributions of connection terminations that originate in each of the following: subcortex (left), infragranular (mid left), granular (mid right), supragranular (right)

### 2.4 Somatosensory cortex

For a summary of reported cortical laminar connections in the somatosensory cortex see figure 4 (below).

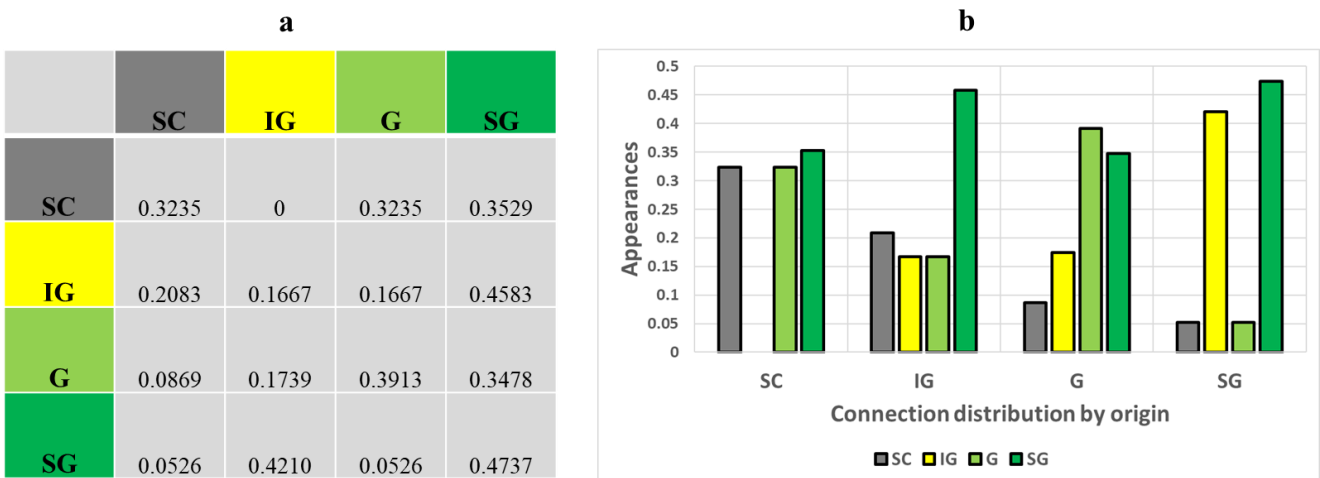

**Fig. 4** Summary of all reported cortical laminar connections in ‘somatosensory cortex’:

- a- In connectivity matrix format, where: [row, column]=[connection origin, connection termination] and connections are averaged per origin (per row)
- b- Presented as distributions of connection terminations that originate in each of the following: subcortex (left), infragranular (mid left), granular (mid right), supragranular (right)

## 2.5 Other

For a summary of reported cortical laminar connections in ‘other’ cortical regions see figure 5 (below).

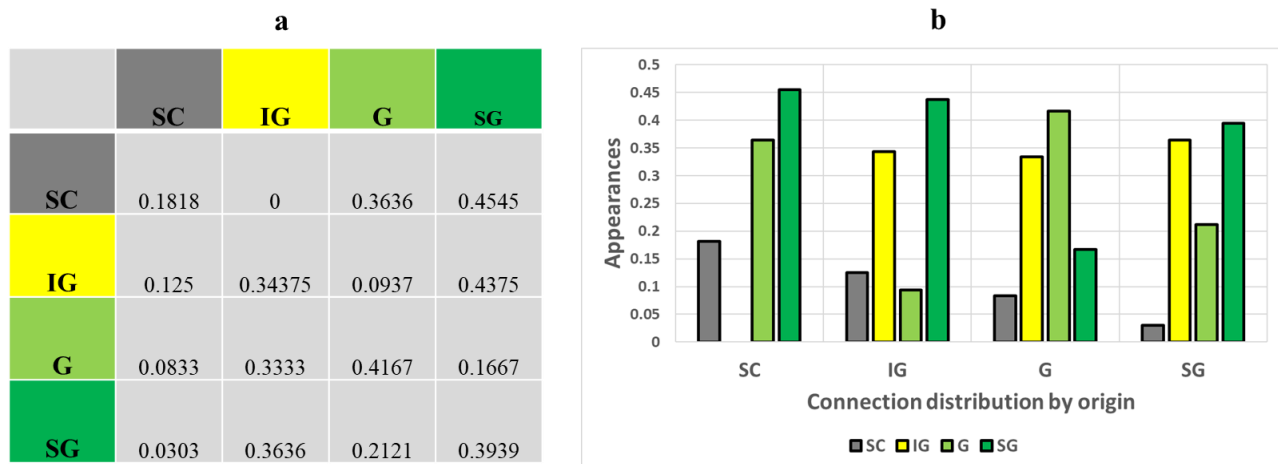

**Fig. 5** Summary of all reported cortical laminar connections in ‘other’ regions:

- a- In connectivity matrix format, where: [row, column]=[connection origin, connection termination] and connections are averaged per origin (per row)
- b- Presented as distributions of connection terminations that originate in each of the following: subcortex (left), infragranular (mid left), granular (mid right), supragranular (right)

\*Too little region-specific reported data regarding local cortical laminar connectivity in motor and auditory cortices.

### 3. Explanation of origin of rules for horizontal laminar connections

Horizontally oriented laminar connections are extrinsic nonlocal connections between laminar components of different cortical regions. Our model's rules for horizontal connections were extracted from a general schematic model of directed connections (see figure 6).

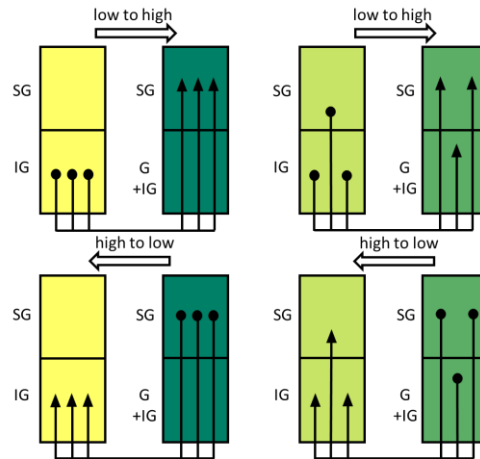

**Fig. 6** Schematic model for horizontal laminar connections, based on the granularity of the connecting regions. The model is adapted from a similar model, which has been widely reported and studied since the 1980s (Beul and Hilgetatg 2015, adapted from von Economo 2009 and from Barbas and Rempel-Clover 1997; a similar model also appears in Shipp 2005, adapted from Barbas and Rempel-Clover 1997 and Barabs 1986)

An initial set of rules of directed laminar horizontal connectivity was extracted from the abovementioned schematic model, based on the granularity indices and laminar compositions of the regions of origin and termination (see table 2). The rules of directed connectivity were then expanded from multiple laminar regions of origin/termination to single laminar groups, using the corresponding laminar composition (see table 3, rules: C.1.1, C.1.2, C.4.1, C.4.2, D.3.1, D.3.2, D.4.1, D.4.2).

After the rules of directed connectivity were expanded, they were organized into undirected categories according to the connecting regions (see table 4, organized by color). Subsequently, the probabilities within each category were summed, resulting in the final undirected model of horizontally oriented connections (see table 5).



|          |          |                                  |
|----------|----------|----------------------------------|
| <b>a</b> | Number:  | Cortex granularity:              |
|          | 1        | Agranular                        |
|          | 2        | Slightly granular                |
|          | 3        | Increasing granule cell presence |
|          | 4        | Increasing granule cell presence |
|          | 5        | Increasing granule cell presence |
| 6        | Granular |                                  |

|          |              |          |          |          |          |   |   |
|----------|--------------|----------|----------|----------|----------|---|---|
| <b>b</b> | Termination: | 1        | 2        | 3        | 4        | 5 | 6 |
|          | Origin:      |          |          |          |          |   |   |
|          | 1            | E, local | C        |          |          | A |   |
|          | 2            | D        | E, local | C        |          |   |   |
|          | 3            | D        |          | E, local | C        |   |   |
|          | 4            | D        |          |          | E, local | C |   |
| 5        | D            |          |          |          | E, local | C |   |
| 6        | B            | D        |          |          | E, local |   |   |

|          |       |              |         |                      |                    |                      |                    |                                                                              |                       |
|----------|-------|--------------|---------|----------------------|--------------------|----------------------|--------------------|------------------------------------------------------------------------------|-----------------------|
| <b>c</b> | Rule: | Subcategory: | Origin: | Termination:         | Origin             |                      | Termination        |                                                                              | Strength probability: |
|          |       |              |         |                      | Layer composition: | Prob.:               | Layer composition: | Prob.:                                                                       |                       |
| A        | A     | 1            | 6       | P(IG,low)            | 1                  | P(SG,high)           | 1                  | $\frac{P(IG,low)}{P(IG,low) + P(SG,high)}$                                   |                       |
| B        | B     | 6            | 1       | P(SG,high)           | 1                  | P(IG,low)            | 1                  | $\frac{P(SG,high)}{P(IG,low) + P(SG,high)}$                                  |                       |
|          | C.1   |              |         | P(SG,low)            | (1/3)              | P(IG,high)+P(G,high) | (1/3)              | $\left(\frac{1}{3}\right)^2 \cdot P_{low2high}$                              |                       |
|          | C.2   |              |         | P(SG,low)            | (1/3)              | P(SG,high)           | (2/3)              | $\left(\frac{1}{3}\right) \cdot \left(\frac{2}{3}\right) \cdot P_{low2high}$ |                       |
|          | C.3   |              |         | P(IG,low)            | (2/3)              | P(SG,high)           | (2/3)              | $\left(\frac{2}{3}\right)^2 \cdot P_{low2high}$                              |                       |
| C        | C.4   | X            | >X      | P(IG,low)            | (2/3)              | P(IG,high)+P(G,high) | (1/3)              | $\left(\frac{1}{3}\right) \cdot \left(\frac{2}{3}\right) \cdot P_{low2high}$ |                       |
|          | D.1   |              |         | P(SG,high)           | (2/3)              | P(IG,low)            | (2/3)              | $\left(\frac{2}{3}\right)^2 \cdot P_{high2low}$                              |                       |
|          | D.2   |              |         | P(SG,high)           | (2/3)              | P(SG,low)            | (1/3)              | $\left(\frac{1}{3}\right) \cdot \left(\frac{2}{3}\right) \cdot P_{high2low}$ |                       |
|          | D.3   |              |         | P(IG,high)+P(G,high) | (1/3)              | P(SG,low)            | (1/3)              | $\left(\frac{1}{3}\right)^2 \cdot P_{high2low}$                              |                       |
| D        | D.4   | >X           | X       | P(IG,high)+P(G,high) | (1/3)              | P(IG,low)            | (2/3)              | $\left(\frac{1}{3}\right) \cdot \left(\frac{2}{3}\right) \cdot P_{high2low}$ |                       |
|          | E.1   |              |         | P(SG,1)              | 1                  | P(SG,2)              | 1                  | $\frac{P(SG,1)}{P(SG,1) + P(SG,2)}$                                          |                       |
|          | E.2   |              |         | P(SG,2)              | 1                  | P(SG,1)              | 1                  | $\frac{P(SG,2)}{P(SG,1) + P(SG,2)}$                                          |                       |
| E        | E.2   | X            | X       | P(SG,2)              | 1                  | P(SG,1)              | 1                  | $\frac{P(SG,2)}{P(SG,1) + P(SG,2)}$                                          |                       |

**Table 2** Initial set of rules of directed horizontal connectivity, expanded from figure 6:

- a- Cortical granularity indices, ranging from agranular (1) to granular (6);
  - b- Rules of directed laminar connectivity (A-E), applied according to granularity of connecting regions;
  - c- Full description of all rules of directed connectivity, estimated according to their laminar content.
- Final laminar connection strengths are calculated by multiplying tractography connection strengths by laminar strength probabilities (last column);

Where: P(L,R)- composition of laminar group L (SG- supragranular, G- granular , IG- infragranular) in region R (high/low represents relative granularity index, or 1/2 when they are equal)

| Rule: | Subcategory:         | Origin: | Termination: | Origin             |        | Termination          |                                                             | Strength probability:                                       |           |                                                        |                                      |
|-------|----------------------|---------|--------------|--------------------|--------|----------------------|-------------------------------------------------------------|-------------------------------------------------------------|-----------|--------------------------------------------------------|--------------------------------------|
|       |                      |         |              | Layer composition: | Prob.: | Layer composition:   | Prob.:                                                      |                                                             |           |                                                        |                                      |
| A     | A                    | 1       | 6            | P(IG,low)          | 1      | P(SG,high)           | 1                                                           | $\frac{P(IG,low)}{P(IG,low) + P(SG,high)}$                  |           |                                                        |                                      |
| B     | B                    | 6       | 1            | P(SG,high)         | 1      | P(IG,low)            | 1                                                           | $\frac{P(SG,high)}{P(IG,low) + P(SG,high)}$                 |           |                                                        |                                      |
| C     | C.1                  | X       | >X           | P(SG,low)          | (1/3)  | P(IG,high)+P(G,high) | (1/3)                                                       | $S1 = (\frac{1}{3})^2 \cdot P_{low2high}$                   |           |                                                        |                                      |
|       | C.1.1                |         |              |                    |        | P(IG,high)           |                                                             | $\frac{P(IG,high)}{P(IG,high)+P(G,high)} \cdot S1$          |           |                                                        |                                      |
|       | C.1.2                |         |              |                    |        | P(G,high)            |                                                             | $\frac{P(G,high)}{P(IG,high)+P(G,high)} \cdot S1$           |           |                                                        |                                      |
|       | C.2                  |         |              | P(SG,low)          | (1/3)  | P(SG,high)           | (2/3)                                                       | $(\frac{1}{3}) \cdot (\frac{2}{3}) \cdot P_{low2high}$      |           |                                                        |                                      |
|       | C.3                  |         |              | P(IG,low)          | (2/3)  | P(SG,high)           | (2/3)                                                       | $(\frac{2}{3})^2 \cdot P_{low2high}$                        |           |                                                        |                                      |
|       | C.4                  |         |              | P(IG,low)          | (2/3)  | P(IG,high)+P(G,high) | (1/3)                                                       | $S2 = (\frac{1}{3}) \cdot (\frac{2}{3}) \cdot P_{low2high}$ |           |                                                        |                                      |
|       | C.4.1                |         |              |                    |        | P(IG,high)           |                                                             | $\frac{P(IG,high)}{P(IG,high)+P(G,high)} \cdot S2$          |           |                                                        |                                      |
|       | C.4.2                |         |              |                    |        | P(G,high)            |                                                             | $\frac{P(G,high)}{P(IG,high)+P(G,high)} \cdot S2$           |           |                                                        |                                      |
|       | D                    |         |              | D.1                | X      | X                    | P(SG,high)                                                  | (2/3)                                                       | P(IG,low) | (2/3)                                                  | $(\frac{2}{3})^2 \cdot P_{high2low}$ |
|       | D.2                  |         |              | P(SG,high)         |        |                      | (2/3)                                                       | P(SG,low)                                                   | (1/3)     | $(\frac{1}{3}) \cdot (\frac{2}{3}) \cdot P_{high2low}$ |                                      |
| D.3   | P(IG,high)+P(G,high) | (1/3)   | P(SG,low)    | (1/3)              |        |                      | $S3 = (\frac{1}{3})^2 \cdot P_{high2low}$                   |                                                             |           |                                                        |                                      |
| D.3.1 |                      |         | P(IG,high)   |                    |        |                      | $\frac{P(IG,high)}{P(IG,high)+P(G,high)} \cdot S3$          |                                                             |           |                                                        |                                      |
| D.3.2 |                      |         | P(G,high)    |                    |        |                      | $\frac{P(G,high)}{P(IG,high)+P(G,high)} \cdot S3$           |                                                             |           |                                                        |                                      |
| D.4   | P(IG,high)+P(G,high) | (1/3)   | P(IG,low)    | (2/3)              |        |                      | $S4 = (\frac{1}{3}) \cdot (\frac{2}{3}) \cdot P_{high2low}$ |                                                             |           |                                                        |                                      |
| D.4.1 |                      |         | P(IG,high)   |                    |        |                      | $\frac{P(IG,high)}{P(IG,high)+P(G,high)} \cdot S4$          |                                                             |           |                                                        |                                      |
| D.4.2 |                      |         | P(G,high)    |                    |        |                      | $\frac{P(G,high)}{P(IG,high)+P(G,high)} \cdot S4$           |                                                             |           |                                                        |                                      |
| E     | E.1                  | X       | X            | P(SG,1)            |        |                      | 1                                                           | P(SG,2)                                                     | 1         | $\frac{P(SG,1)}{P(SG,1) + P(SG,2)}$                    |                                      |
| E.2   |                      |         |              |                    |        |                      | P(SG,2)                                                     | 1                                                           | P(SG,1)   | 1                                                      | $\frac{P(SG,2)}{P(SG,1) + P(SG,2)}$  |

**Table 3** Expanded set of rules of directed horizontal connectivity, expanded to single lamina groups from table 2c: Full description of all rules of directed connectivity, estimated according to their lamina content. Final lamina connection strengths are calculated by multiplying tractography connection strengths by lamina strength probabilities (last column);

Where: P(L,R)- composition of lamina group L (SG- supragranular, G- granular, IG- infragranular) in region R (high/low represents relative granularity index, or 1/2 when they are equal);

Additional values:

$$P_{low} = \frac{2}{3} \cdot P(IG,low) + \frac{1}{3} \cdot P(SG,low) ; P_{high} = \frac{2}{3} \cdot P(SG,high) + \frac{1}{3} \cdot (P(IG,high) + P(G,high)) ;$$

$$P_{low2high} = \frac{P_{low}}{P_{low} + P_{high}} ; P_{high2low} = \frac{P_{high}}{P_{low} + P_{high}}$$

$$S1 = (\frac{1}{3})^2 \cdot P_{low2high} ; S2 = (\frac{1}{3}) \cdot (\frac{2}{3}) \cdot P_{low2high} ; S3 = (\frac{1}{3})^2 \cdot P_{high2low} ; S4 = (\frac{1}{3}) \cdot (\frac{2}{3}) \cdot P_{high2low}$$

| Rule: | Subcategory: | Connecting regions: |    | Region 1           |        | Region 2           |        | Strength probability:                              |
|-------|--------------|---------------------|----|--------------------|--------|--------------------|--------|----------------------------------------------------|
|       |              |                     |    | Layer composition: | Prob.: | Layer composition: | Prob.: |                                                    |
| A     | A            | 1                   | 6  | P(IG,low)          | 1      | P(SG,high)         | 1      | 1                                                  |
| B     | B.1          | X                   | >X | P(SG,low)          |        | P(IG,high)         |        | $\frac{P(IG,high)}{P(IG,high)+P(G,high)} \cdot S1$ |
|       |              |                     |    | P(IG,high)         |        | P(SG,low)          |        | $\frac{P(IG,high)}{P(IG,high)+P(G,high)} \cdot S3$ |
|       | B.2          |                     |    | P(SG,low)          |        | P(G,high)          |        | $\frac{P(G,high)}{P(IG,high)+P(G,high)} \cdot S1$  |
|       |              |                     |    | P(G,high)          |        | P(SG,low)          |        | $\frac{P(G,high)}{P(IG,high)+P(G,high)} \cdot S3$  |
|       | B.3          |                     |    | P(SG,low)          | (1/3)  | P(SG,high)         | (2/3)  | $\frac{1}{3} \cdot \frac{2}{3} \cdot P_{low2high}$ |
|       |              |                     |    | P(SG,high)         | (2/3)  | P(SG,low)          | (1/3)  | $\frac{1}{3} \cdot \frac{2}{3} \cdot P_{high2low}$ |
|       | B.4          |                     |    | P(IG,low)          | (2/3)  | P(SG,high)         | (2/3)  | $\frac{2}{3}^2 \cdot P_{low2high}$                 |
|       |              |                     |    | P(SG,high)         | (2/3)  | P(IG,low)          | (2/3)  | $\frac{2}{3}^2 \cdot P_{high2low}$                 |
|       | B.5          |                     |    | P(IG,low)          |        | P(IG,high)         |        | $\frac{P(IG,high)}{P(IG,high)+P(G,high)} \cdot S2$ |
|       |              |                     |    | P(IG,high)         |        | P(IG,low)          |        | $\frac{P(IG,high)}{P(IG,high)+P(G,high)} \cdot S4$ |
|       | B.6          |                     |    | P(IG,low)          |        | P(G,high)          |        | $\frac{P(G,high)}{P(IG,high)+P(G,high)} \cdot S2$  |
|       |              |                     |    | P(G,high)          |        | P(IG,low)          |        | $\frac{P(G,high)}{P(IG,high)+P(G,high)} \cdot S4$  |
| B     | C            | X                   | >X | P(G,high)          |        | P(IG,low)          |        |                                                    |
| C     | C            | X                   | X  | P(SG,1)            | 1      | P(SG,2)            | 1      | 1                                                  |

**Table 4** Categorized rules of undirected horizontal connectivity (derived from table 3):

Full description of all rules of undirected connectivity, estimated according to their laminar content.

Final laminar connection strengths are calculated by multiplying tractography connection strengths by laminar strength probabilities (last column);

Where: P(L,R)- composition of laminar group L (SG- supragranular, G- granular , IG- infragranular) in region R (high/low represents relative granularity index, or 1/2 when they are equal);

Additional values as described for table 3

|          |                |                                  |
|----------|----------------|----------------------------------|
| <b>a</b> | <b>Number:</b> | <b>Cortex granularity:</b>       |
|          | 1              | Agranular                        |
|          | 2              | Slightly granular                |
|          | 3              | Increasing granule cell presence |
|          | 4              | Increasing granule cell presence |
|          | 5              | Increasing granule cell presence |
| 6        | Granular       |                                  |

|          |                     |          |          |          |          |          |   |
|----------|---------------------|----------|----------|----------|----------|----------|---|
| <b>b</b> | <b>Termination:</b> | 1        | 2        | 3        | 4        | 5        | 6 |
|          | <b>Origin:</b>      |          |          |          |          |          |   |
|          | 1                   | C, local | B        |          |          |          | A |
|          | 2                   | B        | C, local | B        |          |          |   |
|          | 3                   | B        |          | C, local | B        |          |   |
|          | 4                   | B        |          |          | C, local | B        |   |
| 5        | B                   |          |          |          | C, local | B        |   |
| 6        | A                   | B        |          |          |          | C, local |   |

|          |              |                     |                            |           |                           |                                                                                                         |                              |
|----------|--------------|---------------------|----------------------------|-----------|---------------------------|---------------------------------------------------------------------------------------------------------|------------------------------|
| <b>c</b> | <b>Rule:</b> | <b>Subcategory:</b> | <b>Connecting regions:</b> |           | <b>Region 1</b>           | <b>Region 2</b>                                                                                         | <b>Strength probability:</b> |
|          |              |                     |                            |           | <b>Layer composition:</b> | <b>Layer composition:</b>                                                                               |                              |
| A        | A            | 1                   | 6                          | P(IG,low) | P(SG,high)                | 1                                                                                                       |                              |
| B        | B.1          | X                   | >X                         | P(IG,low) | P(IG,high)                | $\frac{P(IG,high)}{P(IG,high)+P(G,high)} \cdot \left(\frac{1}{3}\right) \cdot \left(\frac{2}{3}\right)$ |                              |
|          | B.2          |                     |                            | P(IG,low) | P(G,high)                 | $\frac{P(G,high)}{P(IG,high)+P(G,high)} \cdot \left(\frac{1}{3}\right) \cdot \left(\frac{2}{3}\right)$  |                              |
|          | B.3          |                     |                            | P(IG,low) | P(SG,high)                | $\left(\frac{2}{3}\right)^2$                                                                            |                              |
|          | B.4          |                     |                            | P(SG,low) | P(IG,high)                | $\frac{P(IG,high)}{P(IG,high)+P(G,high)} \cdot \left(\frac{1}{3}\right)^2$                              |                              |
|          | B.5          |                     |                            | P(SG,low) | P(G,high)                 | $\frac{P(G,high)}{P(IG,high)+P(G,high)} \cdot \left(\frac{1}{3}\right)^2$                               |                              |
|          | B.6          |                     |                            | X         | >X                        | P(SG,low)                                                                                               | P(SG,high)                   |
| C        | C            | X                   | X                          | P(XG,1)   | P(XG,2)                   | 1                                                                                                       |                              |

**Table 5** Final undirected model of horizontally oriented connections (derived from table 4):

- a- Cortical granularity indices, ranging from agranular (1) to granular (6);
  - b- Rules of directed laminar connectivity (A-E), applied according to granularity of connecting regions;
  - c- Full description of all rules of undirected connectivity, estimated according to their laminar content.
- Final laminar connection strengths are calculated by multiplying tractography connection strengths by laminar strength probabilities (last column);

Where: P(L,R)- composition of laminar group L (SG- supragranular, G- granular , IG- infragranular) in region R (high/low represents relative granularity index, or 1/2 when they are equal)
